# Supplementary material for: MWCNT-Coated Glass Fabric/Phenol Composite Heating Panel Fabricated by Resin Infusion Process
Source: Polymers (Basel). 2023 Aug 10;15(16):3353. doi: 10.3390/polym15163353 (PMC10459559; doi:10.3390/polym15163353)
Supplement: Supplementary file 1 [file polymers-15-03353-s001.zip › polymers-2020470-supplementary.pdf]

## **Supporting Information**

### **MWCNT-coated glass fabric/phenol composite heating panel fabricated by resin infusion process**

Seongpil Choi<sup>1</sup>, Juyeop Park<sup>2</sup>, Donghoon Kang<sup>3,\*</sup>, and Sang-Eui Lee<sup>1,\*</sup>

<sup>1</sup> Department of Mechanical Engineering, Inha University

<sup>2</sup> Department of Mechanical Engineering, Hanyang University

<sup>3</sup> Railroad Accident Research Department, Korea Railroad Research Institute

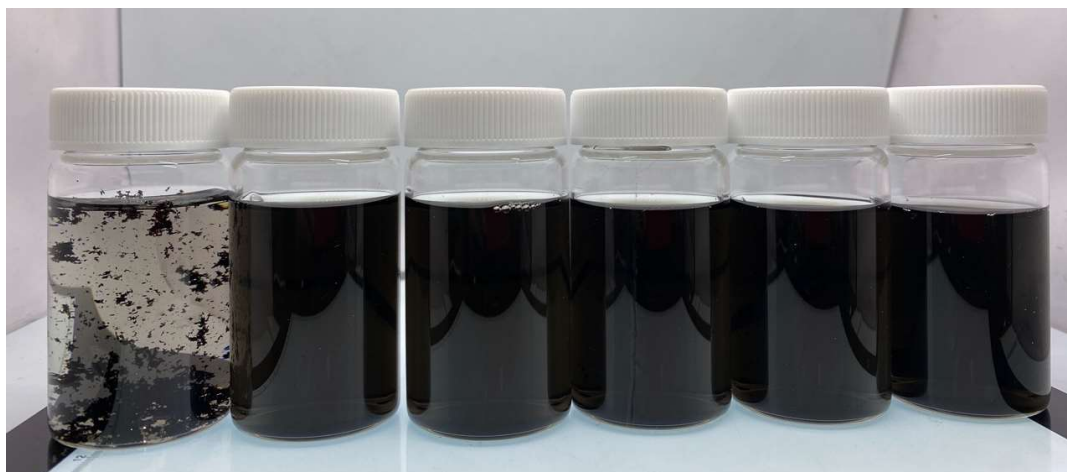

**Figure S1.** MWCNT water solution with the ratio of MWCNT:SDBS (1:1, 1:3, 1:5, 1:10, 1:15, 1:20)

In Figure S1, the undiluted CNT-SDBS solution is shown. As shown in the figure, the dispersion was not observed due to the thick dark color, except in the ratio of MWCNT/SDBS ratio of 1:1. Therefore, the solutions were diluted 20 times for the Figure 4(a). Multiple light scattering didn't work for measuring the change in the dispersion with time. Instead, the solutions were coated on GF fabrics and then the electrical conductivity was measured to compare the dispersion of MWCNTs according to the ratio of the filler and SDBS.

**Table S1.** Studies on mechanical properties of MWCNT-added glass fiber-reinforced composites

| Ref # | CNT                 | Resin | FRP         | CNT content | Tensile test | Bending test | Shear test | Property | Pristine FRP | CNT-added FRP | Increment | Note               |
|-------|---------------------|-------|-------------|-------------|--------------|--------------|------------|----------|--------------|---------------|-----------|--------------------|
| 14    | MWCNT               | epoxy | GF - UD     | 0.1 wt%     |              | O            |            | $E_B$    | 24.3         | 27.1          | 11.5%     |                    |
|       |                     |       |             |             |              |              |            | $S_B$    | 317.0        | 420.8         | 32.7%     |                    |
|       |                     |       |             |             |              |              |            | $U_B$    | 1.9          | 2.1           | 9.4%      |                    |
| 16    | CNT                 | epoxy | GF - UD     | 0.3 wt%     | O            |              |            | $S_T$    | 430          | 475           | 10.5%     |                    |
| 17    | Oxidized-MWCNT      | epoxy | GF - fabric | 1.0 wt%     |              |              | O          | $ILSS$   | 32.49        | 38.4          | 18.2%     |                    |
| 19    | MWCNT-COOH          | epoxy | GF - fabric | 0.5 g/L     | O            | O            | O          | $E_T$    | 29           | 41            | 41.4%     |                    |
|       |                     |       |             |             |              |              |            | $S_T$    | 615          | 810           | 31.7%     |                    |
|       |                     |       |             |             |              |              |            | $E_B$    | 15.8         | 21.6          | 36.7%     |                    |
|       |                     |       |             |             |              |              |            | $S_B$    | 1325         | 1725          | 30.2%     |                    |
|       |                     |       |             |             |              |              |            | $ILSS$   | 56           | 81            | 44.6%     |                    |
| 21    | Oxidized-MWCNT      | epoxy | GF - UD     | 0.1wt%      | O            |              |            | $E_T$    | 7.5          | 7.25          | -3.3%     | Epoxy modification |
|       |                     |       |             |             |              |              |            | $S_T$    | 335          | 370           | 10.4%     |                    |
|       |                     |       |             |             |              |              |            | $E_T$    | 7.5          | 4.8           | -36.0%    | Both modification  |
|       |                     |       |             |             |              |              |            | $S_T$    | 335          | 325           | -3.0%     | on GF and epoxy    |
| 23    | Ozone-treated MWCNT | epoxy | GF - UD     | 14%         |              |              | O          | $IPSS$   | 47           | 85            | 80.9%     |                    |
| 37    | MWCNT               | epoxy | GF fabric   | 0.4 wt%     | O            |              | O          | $E_T$    | 22.2         | 23.4          | 5.4%      |                    |
|       |                     |       |             |             |              |              |            | $S_T$    | 410.5        | 418.4         | 1.9%      |                    |
|       |                     |       |             |             |              |              |            | $ILSS$   | 41.9         | 54.7          | 30.5%     |                    |

$IPSS$ : In plane shear strength,  $E$ : modulus (GPa),  $S$ : strength (MPa). Subscript  $B$ : bending subscript  $T$ : tensile
